# Supplementary material for: Flexible free-standing Ni–Mn oxide antenna decorated CNT/nanofiber membrane for high-volumetric capacitance supercapacitors
Source: Royal Society of Chemistry journal article supplement (doi:10.1039/d1nr03700e), 2021-01-01
Supplement: d1nr03700e1.pdf [file d1nr03700e1.pdf]

## Supporting Information

### **Flexible free-standing Ni-Mn oxides antennas decorated CNTs/nanofibers membrane for high- volumetric capacitance supercapacitors**

*Niranjala Fernando <sup>†</sup>, Amutha Chinnappan <sup>‡</sup>, Atif. Aziz <sup>§,\*</sup>, Amor Abdelkader <sup>†,\*</sup>, Seeram  
Ramakrishna <sup>‡</sup>, and Mark E. Welland <sup>§</sup>*

<sup>†</sup> Faculty of Science and Technology, Bournemouth University, Poole House, Talbot  
Campus, Poole, Dorset BH12 5BB

<sup>‡</sup> Department of Mechanical Engineering, National University of Singapore, Singapore  
117575, Singapore

<sup>§</sup> Nanoscience Centre, Department of Engineering, University of Cambridge, CB3 0FF, UK.

\* E-mail: aabdelkader@bournemouth.ac.uk

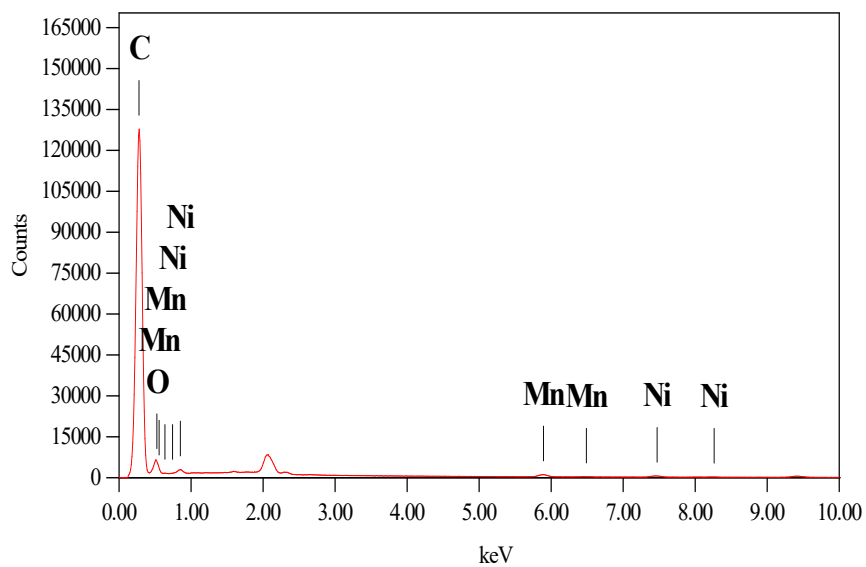

| <i>Element</i> | <i>(KeV)</i> | <i>Mass %</i> | <i>Sigma</i> | <i>Atom %</i> |
|----------------|--------------|---------------|--------------|---------------|
| <i>C K</i>     | 0.277        | 73.51         | 0.18         | 88.41         |
| <i>O K</i>     | 0.525        | 9.13          | 0.17         | 8.24          |
| <i>Mn K</i>    | 5.894        | 6.15          | 0.12         | 1.62          |
| <i>Ni K*</i>   | 7.471        | 5.26          | 0.15         | 1.29          |
| <i>Pt K*</i>   | 2.048        | 5.95          | 0.12         | 0.44          |
| <i>Total</i>   |              | 100           |              | 100           |

**Figure S1:** SEM/EDX analysis of Ni- Mn oxides /CNT@CNF

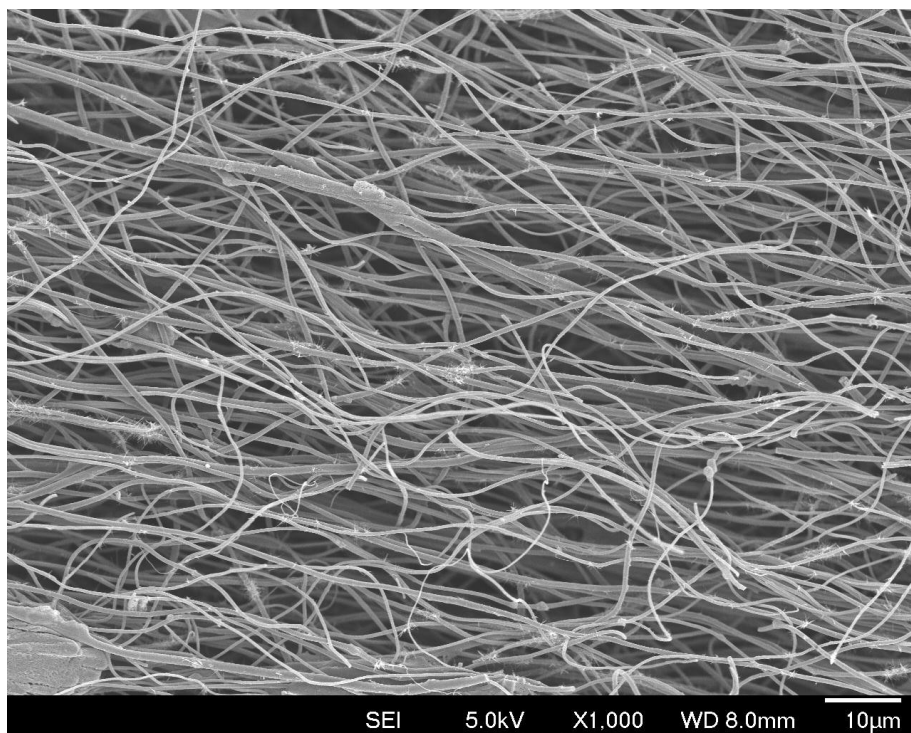

**Figure S2:** SEM images of the as prepared free-standing Ni-Mn oxides /CNT@CNF electrode.

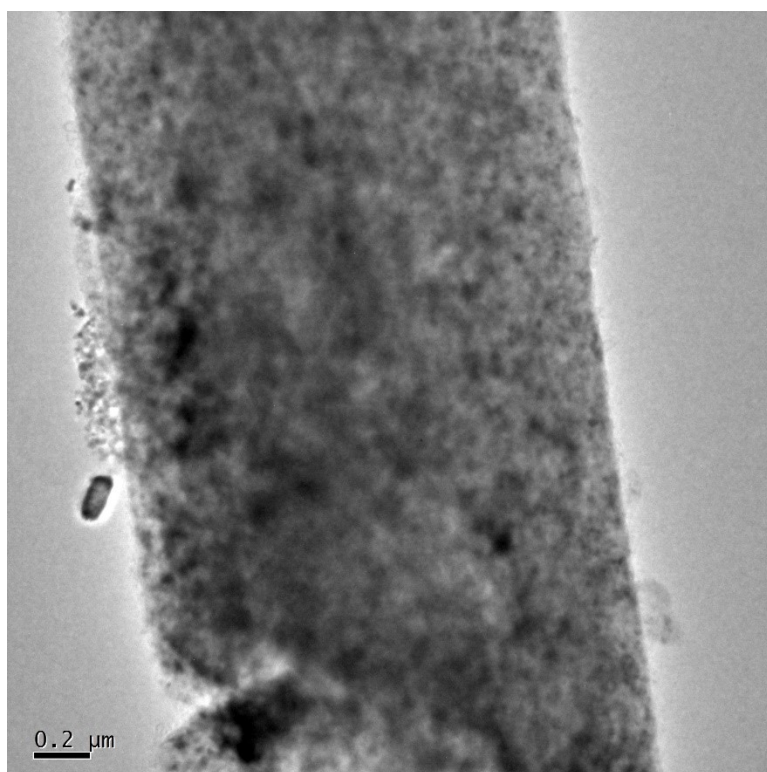

**Figure S3:** TEM image of the nanofibers showing the tubular structure is composed of interconnected nanoparticles.



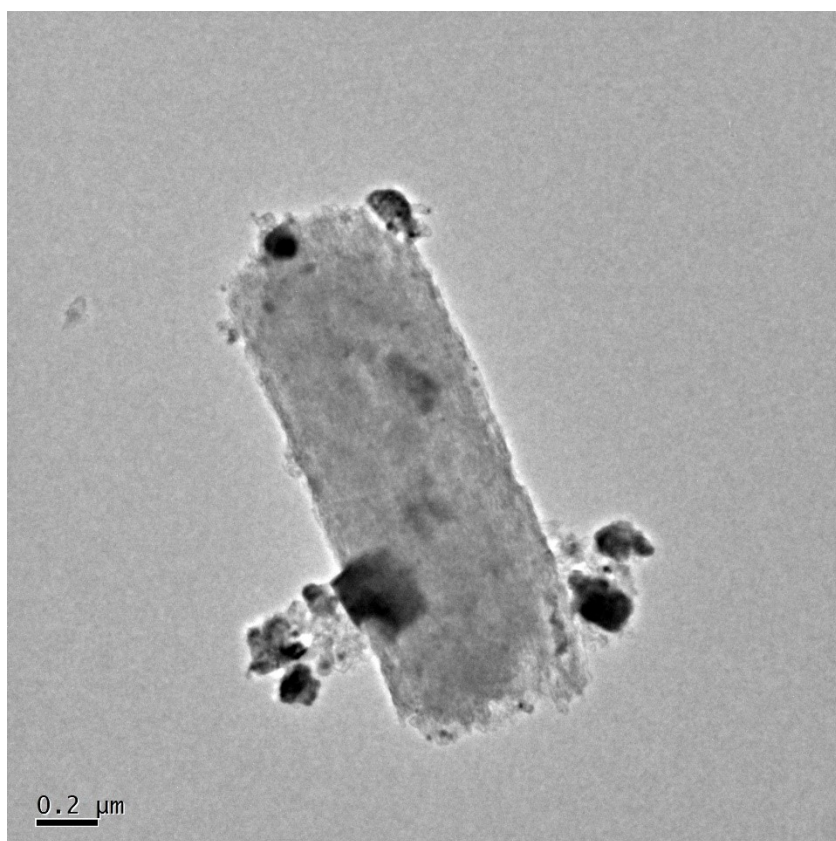

**Figure S4:** TEM image of a part of the nanofiber showing the growth of Ni-Mn oxides antennas out of the fibres surface.

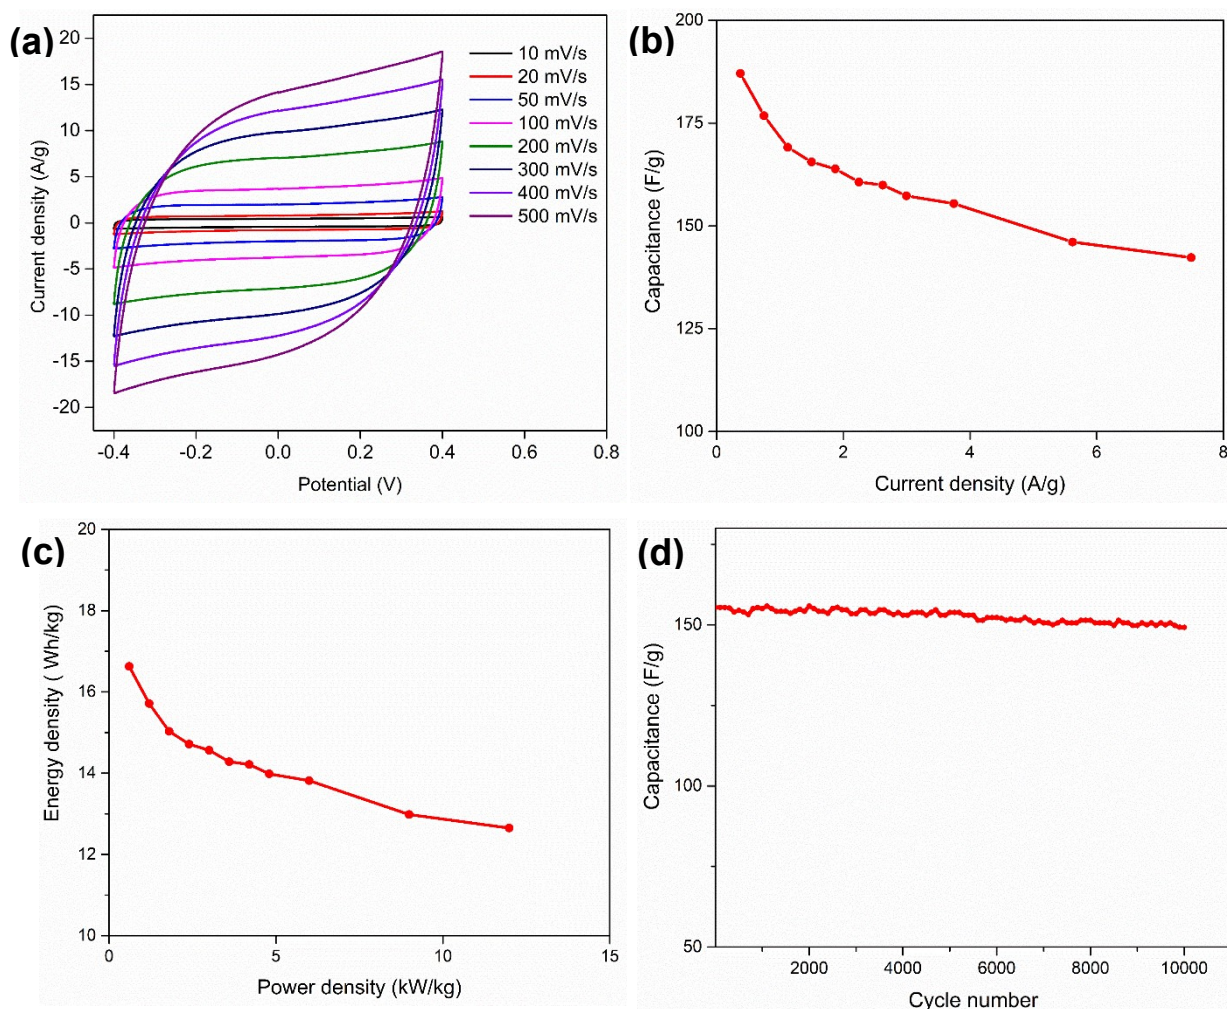

**Figure S5:** Gravimetric electrochemical performance Ni-Mn oxides/CNT@CNF super capacitor device (a) cyclic voltammograms at various scan rates of from 10 to 500 mV s<sup>-1</sup> b) specific gravimetric capacitance at different current densities c) energy and power densities and d) cycling test at a current density of 3.74 A g<sup>-1</sup>.
